# Supplementary material
Source: publisher figshare collection journal article supplement (https://gsapubs.figshare.com/ndownloader/files/23305985)
Supplement: Supplementary file 1 [file 23305985]

## Sheet: Readme
Data Description--KNR166-2 JPC25: Bulk mean grain-size
-------------------------------------------------------------------------------------------------------------------------
Publication: Toomey, M.R., Korty, R.L., Donnelly, J.P., van Hengstum, P.J., Curry, W.B. 2017. Increased hurricane frequency near Florida during Younger Dryas AMOC slowdown. Geology.
-------------------------------------------------------------------------------------------------------------------------
Geographic Location: Florida Margin near Dry Tortugas (24.34 °N, 83.25 °W; 494 mbsl)
Collection Date: January 2002 C.E.
Abstract: The risk posed by intensification of North Atlantic hurricane activity remains controversial, in part due to a lack of available storm proxy records that extend beyond the relatively stable climates of the late Holocene. Here we present a record of storm-triggered turbidite deposition offshore the Dry Tortugas, South Florida, that spans abrupt transitions in North Atlantic sea-surface t…

## Sheet: data
Bulk mean grain-size for core KNR166-2 JPC25
Notes: Column 1: Core depths corrected for desiccation during storage and reported to nearest centimeter.
Column 2: Linear sedimentation rate used between tie-points (see Fig. DR1).
Column 3: Bulk mean grain-size measured on Beckman Coulter LS13320 and reported to nearest micron.
Core Depth (cm)	Time (kyr BP)	Mean Grain-Size (μm)
169	10.206	18
170	10.217	18
171	10.228	17
172	10.24	18
173	10.251	21
174	10.263	22
175	10.274	19
176	10.285	22
177	10.297	16
178	10.308	16
179	10.319	20
180	10.331	19
181	10.342	13
182	10.353	18
183	10.365	19
184	10.376	22
185	10.388	19
186	10.399	19
187	10.41	20
188	10.422	18
189	10.433	19
190	10.444	19
191	10.456	19
192	10.467	19
193	10.478	19
194	10.49	18
195	10.501	18
196	10.513	19
197	10.524	19
198	10.535	17
199	10.547	17
200	10.558	19
201	10.569	20
202	10.581	20
203	10.592	19
204	10.603	21
205	10.615	23
206	10.626	19
207	10.638	13
208	10.649	13
209	10.66	21
210	10.672	20
211	10.683	19
212	10.694	21
213	10.706	20
214	10.717	20
215	10.728	20
216	10.74	20
217	10.751	20
218	10.763	19
219	10.774	19
220	10.785	18
221	10.797	19
222	10.808	20
223	10.819	19
224	10.831	22
225	10.842	20
226	10.853	18
227	10.865	18
228	10.876	18
229	10.888	17
230	10.899	21
231	10.91	19
232	10.922	15
233	10.933	21
234	10.944	18
235	10.956	19
236	10.967	17
237	10.978	18
238	10.99	17
239	11.001	16
240	11.013	17
241	11.024	17
242	11.035	17
243	11.047	18
244	11.058	17
245	11.069	17
246	11.081	16
247	11.092	16
248	11.103	18
249	11.115	18
250	11.126	18
251	11.138	17
252	11.149	20
253	11.16	20
254	11.172	20
255	11.183	18
256	11.194	23
257	11.206	19
258	11.217	19
259	11.228	13
260	11.24	14
261	11.251	18
262	11.263	20
263	11.274	18
264	11.285	18
265	11.297	21
266	11.308	19
267	11.319	20
268	11.331	22
269	11.342	20
270	11.353	22
271	11.365	22
272	11.376	20
273	11.388	20
274	11.399	20
275	11.41	17
276	11.422	17
277	11.433	17
278	11.444	19
279	11.456	20
280	11.467	21
281	11.478	16
282	11.49	17
283	11.501	20
284	11.513	20
285	11.524	23
286	11.535	24
287	11.547	22
288	11.558	22
289	11.569	23
290	11.581	22
291	11.592	22
292	11.603	21
293	11.615	22
294	11.626	22
295	11.638	19
296	11.65	19
297	11.661	20
298	11.673	20
299	11.684	20
300	11.696	21
301	11.702	20
302	11.705	20
303	11.709	21
304	11.712	20
305	11.715	18
306	11.718	18
307	11.721	19
308	11.725	19
309	11.728	19
310	11.731	19
311	11.734	19
312	11.737	18
313	11.741	19
314	11.744	16
315	11.747	20
316	11.75	20
317	11.753	19
318	11.757	20
319	11.76	19
320	11.763	20
321	11.766	20
322	11.769	18
323	11.773	18
324	11.776	19
325	11.779	19
326	11.782	20
327	11.785	18
328	11.789	22
329	11.792	19
330	11.795	19
331	11.798	19
332	11.801	18
333	11.805	20
334	11.808	20
335	11.811	20
336	11.814	19
337	11.817	21
338	11.821	21
339	11.824	21
340	11.827	21
341	11.83	24
342	11.833	22
344	11.837	18
345	11.84	20
346	11.843	21
347	11.846	21
348	11.849	20
349	11.853	21
350	11.856	22
351	11.859	22
352	11.862	25
353	11.865	27
354	11.869	23
355	11.872	23
356	11.875	24
357	11.878	23
358	11.882	24
359	11.885	27
360	11.888	25
361	11.891	25
362	11.894	24
363	11.898	32
364	11.901	34
365	11.904	30
366	11.907	32
367	11.91	21
368	11.914	22
369	11.917	25
370	11.92	21
371	11.923	19
372	11.926	22
373	11.93	22
374	11.933	19
375	11.936	20
376	11.939	21
377	11.942	21
378	11.946	20
379	11.949	21
380	11.952	21
381	11.955	20
382	11.958	20
383	11.962	19
384	11.965	21
385	11.968	23
386	11.971	20
387	11.974	20
388	11.978	22
389	11.981	20
390	11.984	17
391	11.987	29
392	11.99	21
393	11.994	15
394	11.997	19
396	12	23
397	12.003	22
398	12.006	19
399	12.01	19
400	12.013	17
401	12.016	23
402	12.019	21
403	12.022	20
404	12.026	18
405	12.029	27
406	12.032	25
407	12.035	25
408	12.038	21
409	12.042	23
410	12.045	23
411	12.048	22
412	12.051	23
413	12.055	24
414	12.058	23
415	12.061	23
416	12.064	20
417	12.067	22
418	12.071	26
419	12.074	20
420	12.077	19
421	12.08	21
422	12.083	23
423	12.087	24
424	12.09	24
425	12.093	23
426	12.096	22
427	12.099	22
428	12.103	14
429	12.106	15
430	12.109	19
431	12.112	21
432	12.115	23
433	12.119	21
434	12.122	23
435	12.125	24
436	12.128	22
437	12.131	20
438	12.135	20
439	12.138	21
440	12.141	18
441	12.144	19
442	12.147	18
443	12.151	20
444	12.154	24
445	12.157	19
447	12.16	20
448	12.163	20
449	12.167	24
450	12.17	25
451	12.173	23
452	12.176	21
453	12.179	22
454	12.182	21
455	12.186	24
456	12.189	23
457	12.192	18
458	12.195	17
459	12.198	22
460	12.201	23
461	12.204	16
462	12.208	22
463	12.211	23
464	12.214	29
465	12.217	30
466	12.22	33
467	12.223	26
468	12.227	23
469	12.23	26
470	12.233	46
471	12.236	25
472	12.239	57
473	12.242	29
474	12.246	27
475	12.249	25
476	12.252	35
477	12.255	27
478	12.258	21
479	12.261	22
480	12.265	20
481	12.268	19
482	12.271	20
483	12.274	21
484	12.277	26
485	12.28	24
486	12.284	26
487	12.287	25
488	12.29	23
489	12.293	22
490	12.296	30
491	12.299	23
492	12.303	21
493	12.306	21
494	12.309	23
495	12.312	23
496	12.315	23
497	12.318	22
498	12.321	22
499	12.325	22
500	12.328	24
501	12.331	23
502	12.334	24
503	12.337	21
504	12.34	18
505	12.344	21
506	12.347	27
507	12.35	24
508	12.353	23
509	12.356	25
510	12.359	26
511	12.363	27
512	12.366	25
513	12.369	25
514	12.372	25
515	12.375	24
516	12.378	23
517	12.382	24
518	12.385	22
519	12.388	25
520	12.391	23
521	12.394	19
522	12.397	20
523	12.401	19
524	12.404	19
525	12.407	18
526	12.41	21
527	12.413	19
528	12.416	20
529	12.419	20
530	12.423	19
531	12.426	18
532	12.429	20
533	12.432	20
534	12.435	21
535	12.438	22
536	12.442	22
537	12.445	21
538	12.448	23
539	12.451	25
540	12.454	28
541	12.457	28
542	12.461	26
543	12.464	25
544	12.467	26
545	12.47	27
546	12.473	26
547	12.476	44
548	12.48	29
549	12.483	29
550	12.486	30
551	12.489	24
552	12.492	22
553	12.495	25
554	12.499	24
555	12.502	22
556	12.505	24
557	12.508	29
558	12.511	22
559	12.514	22
560	12.518	28
561	12.521	22
562	12.524	21
563	12.527	19
564	12.53	23
565	12.533	22
566	12.536	22
567	12.54	22
568	12.543	23
569	12.546	24
570	12.549	24
571	12.552	25
572	12.555	25
573	12.559	20
574	12.562	22
575	12.565	21
576	12.568	23
577	12.571	23
578	12.574	24
579	12.578	26
580	12.581	23
581	12.584	18
582	12.587	23
583	12.59	23
584	12.593	21
585	12.597	20
586	12.6	22
587	12.603	23
588	12.606	25
589	12.609	21
590	12.612	23
591	12.616	21
592	12.619	18
593	12.622	20
594	12.625	25
595	12.628	23
596	12.631	24
597	12.635	23
598	12.638	28
599	12.641	27
601	12.644	23
602	12.647	18
603	12.65	20
604	12.653	22
605	12.657	24
606	12.66	24
607	12.663	20
608	12.666	21
609	12.669	24
610	12.672	21
611	12.675	22
612	12.679	22
613	12.682	26
614	12.685	27
615	12.688	28
616	12.691	25
617	12.694	25
618	12.697	27
619	12.701	25
620	12.704	24
621	12.707	24
622	12.71	24
623	12.713	23
624	12.716	27
625	12.719	25
626	12.723	25
627	12.726	22
628	12.729	22
629	12.732	21
630	12.735	23
631	12.738	25
632	12.741	24
633	12.745	27
634	12.748	27
635	12.751	26
636	12.754	25
637	12.757	23
638	12.76	23
639	12.763	25
640	12.766	22
641	12.77	20
642	12.773	21
643	12.776	23
644	12.779	23
645	12.782	25
646	12.785	22
647	12.788	24
648	12.792	20
649	12.795	23
650	12.798	25
651	12.801	31
652	12.804	25
653	12.807	26
654	12.81	24
655	12.814	26
656	12.817	24
657	12.82	21
658	12.823	20
659	12.826	18
660	12.829	18
661	12.832	17
662	12.836	19
663	12.839	18
664	12.842	17
665	12.845	18
666	12.848	19
667	12.851	19
668	12.854	23
669	12.858	19
670	12.861	20
671	12.864	23
672	12.867	20
673	12.87	19
674	12.873	21
675	12.876	21
676	12.88	26
677	12.883	25
678	12.886	22
679	12.889	23
680	12.892	24
681	12.895	26
682	12.898	20
